# Supplementary material for: Uptake, translocation and accumulation of nickel and cobalt in Berkheya coddii, a ‘metal crop’ from South Africa
Source: Royal Society of Chemistry journal article supplement (doi:10.1039/d0mt00099j), 2020-01-01
Supplement: d0mt00099j1.pdf [file d0mt00099j1.pdf]

## SUPPLEMENTARY INFORMATION

### **Uptake, translocation and accumulation of nickel and cobalt in *Berkheya coddii*, a ‘metal crop’ from South Africa**

Marie Rue<sup>1,2</sup>, Guillaume Echevarria<sup>1,3</sup>, Antony van der Ent<sup>1,3</sup>, Adrian L. D. Paul<sup>3</sup>,  
Marie-Odile Simonnot<sup>2\*</sup>, Jean Louis Morel<sup>1</sup>

<sup>1</sup>Université de Lorraine, INRAE, LSE, F-54000 Nancy France.

<sup>2</sup>Université de Lorraine, CNRS, LRGP, F-54000 Nancy, France.

<sup>3</sup>Centre for Mined Land Rehabilitation, Sustainable Minerals Institute,  
The University of Queensland, Australia.

\*Corresponding author:

E-mail address: [marie-odile.simonnot@univ-lorraine.fr](mailto:marie-odile.simonnot@univ-lorraine.fr)

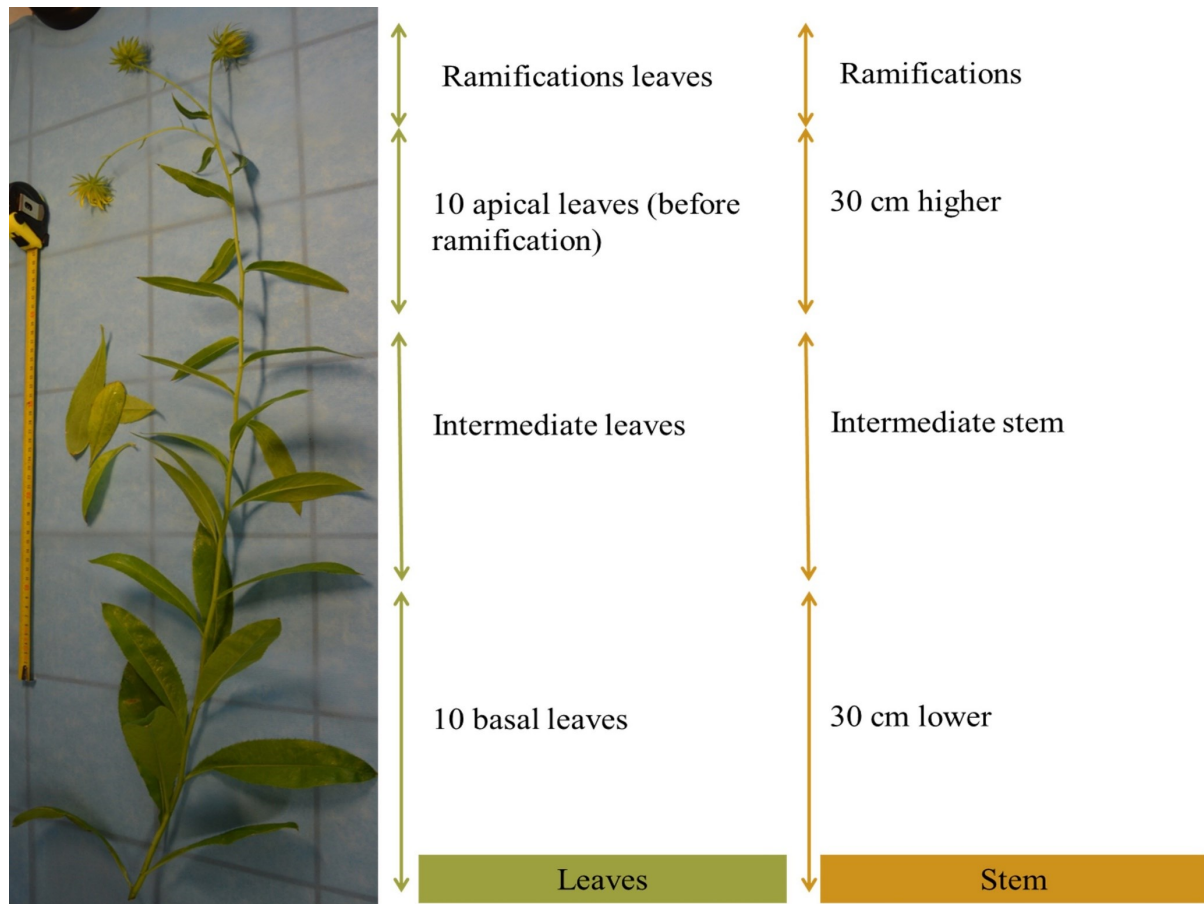

**Figure S1.** Distribution of leaf and stem samples per individual.

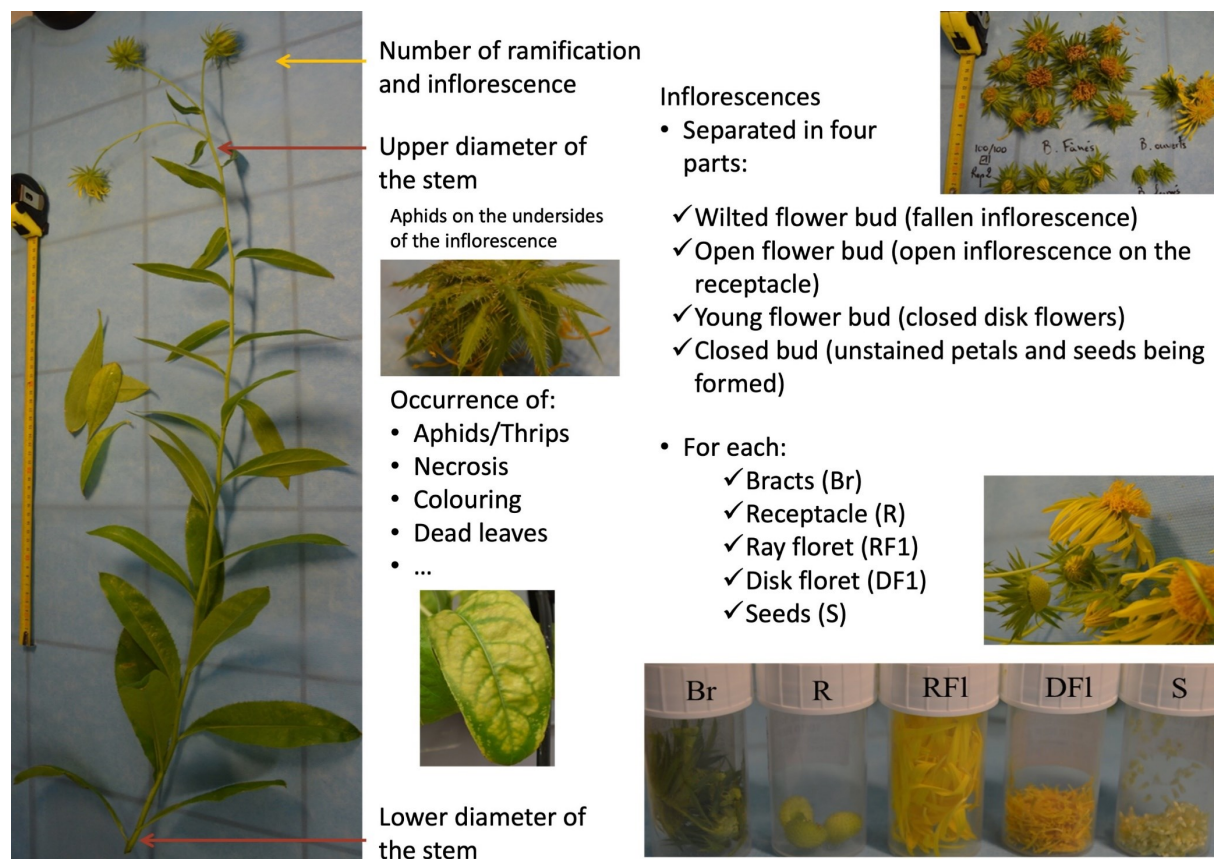

**Figure S2.** Photographs of the samples collected during the harvest floral part harvest: separation of the buds according to their maturity and separation of the flower parts.

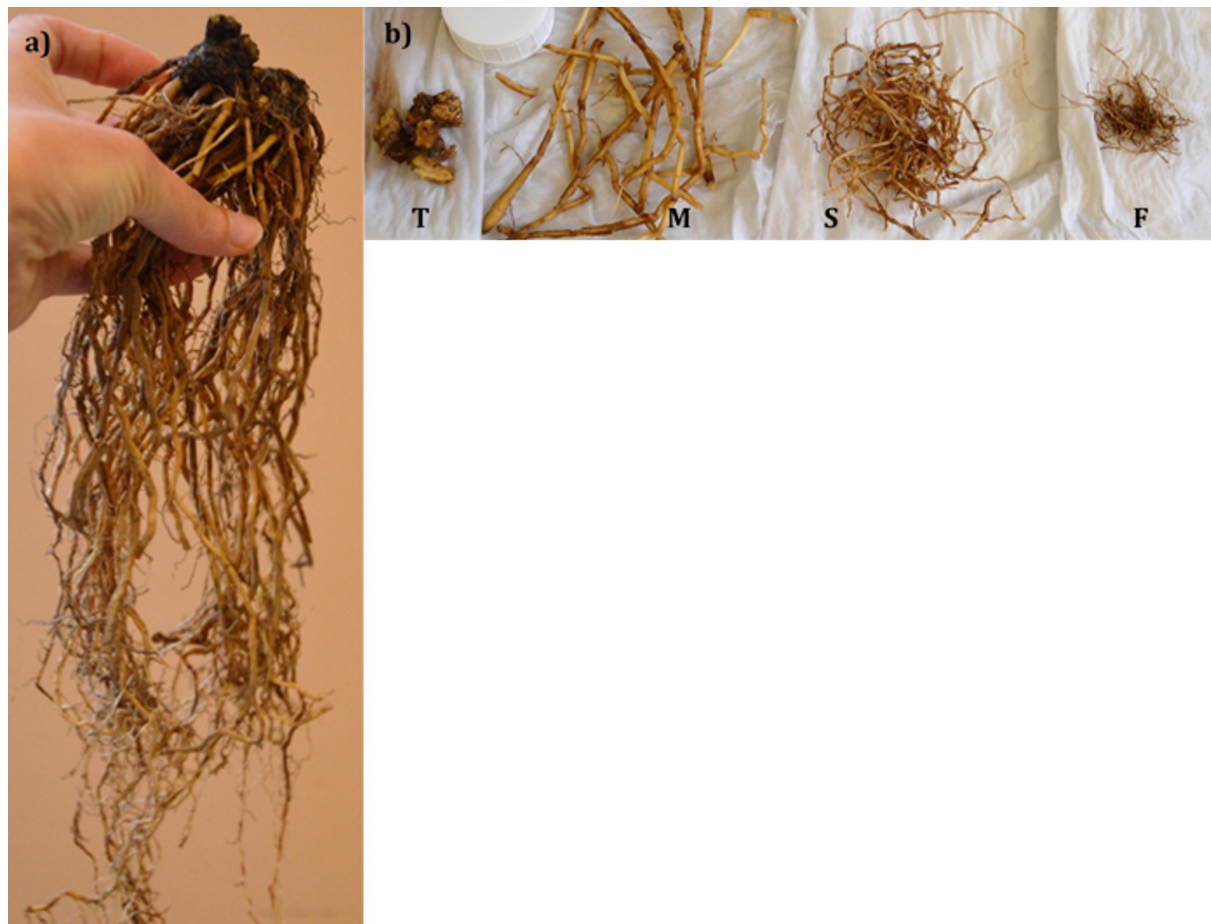

**Figure S3.** Photographs of the roots of a) *B. coddii*; and b) details of the roots of *B. coddii*. T: tuber, M: medium roots, S: small roots, F: fine roots

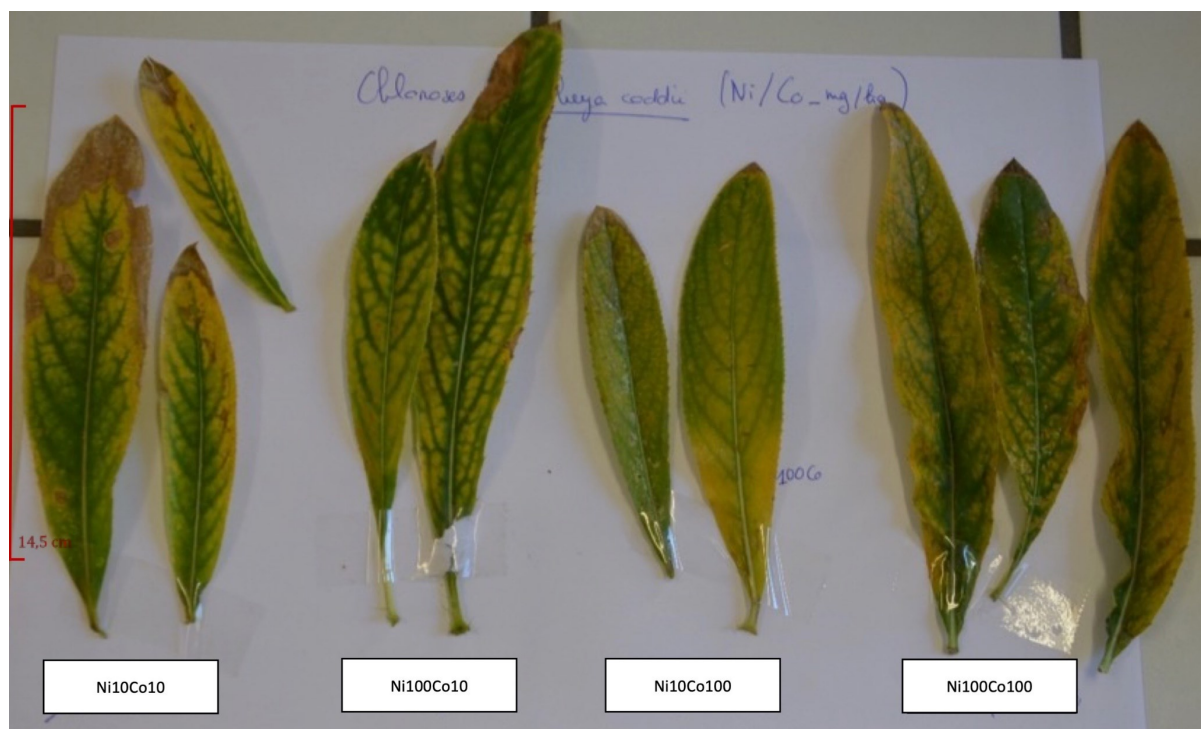

**Figure S4.** Photographs of chlorotic leaves of *B. coddii* according to the modality.

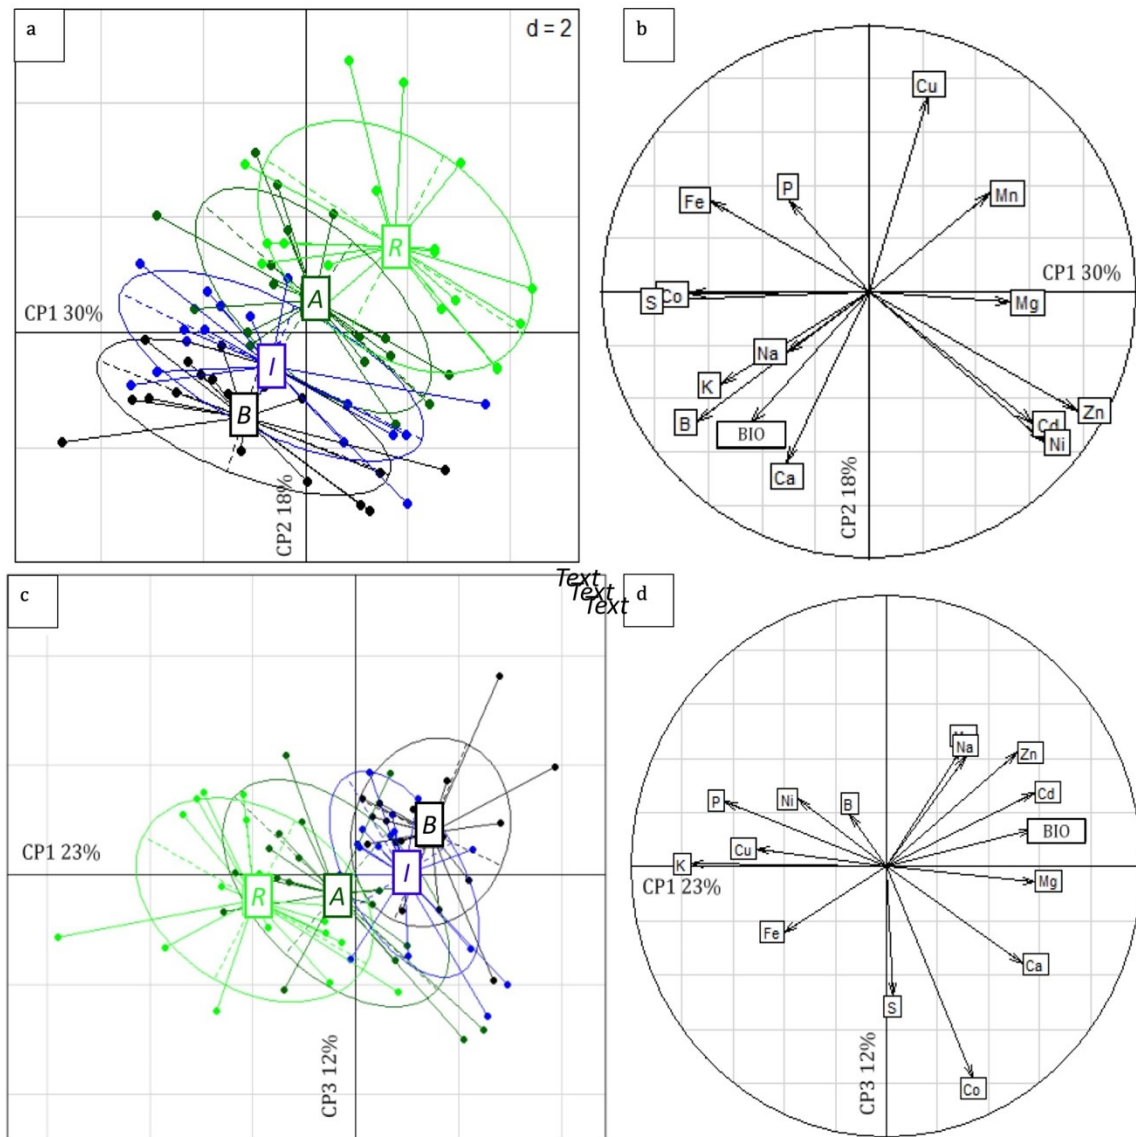

**Figure S5.** Principal component analysis of *B. coddii* leaves composition + characteristics according to their location on the stem (a, b) and of the composition of the stem according to its separation from the seed (c, d) for the four modalities. a and c) B: basal, I: intermediate, A: apical, R: on ramifications. b and d) representation of the measured variables. Bio: biomass and concentration of the elements: Cu, Mn, Mg, Cd, Ni, Ca, Na, K, B, S, Co, Fe, P.



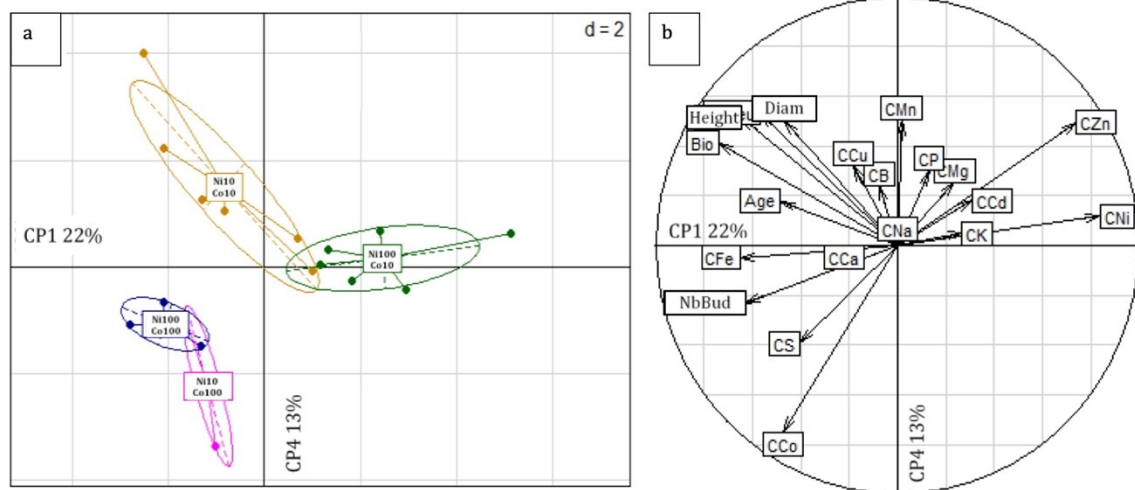

**Figure S6.** Principal component analysis of the *B. coddii* whole plant composition + characteristics according to the modality. Bio: biomass, NbBud: flower bud count, Diam; lower diameter of the stem Height, age and concentration of the elements in the whole plant: Cu, Mn, Mg, Cd, Ni, Ca, Na, K, B, S, Co, Fe, P.

| Parameters                                                     | Soil TO                                           |                           |                             |                                  |                             |
|----------------------------------------------------------------|---------------------------------------------------|---------------------------|-----------------------------|----------------------------------|-----------------------------|
| <b>pH</b>                                                      | 5.93 ± 0.09                                       |                           |                             |                                  |                             |
| <b>CEC Tot (cmol<sup>+</sup> kg<sup>-1</sup>)</b>              | 11.7                                              |                           |                             |                                  |                             |
| <b>Ca/Mg</b>                                                   | 7.46                                              |                           |                             |                                  |                             |
| <b>C<sub>org</sub> (g kg<sup>-1</sup>)</b>                     | 16.0                                              |                           |                             |                                  |                             |
| <b>N<sub>tot</sub> (g kg<sup>-1</sup>)</b>                     | 1.59                                              |                           |                             |                                  |                             |
| <b>C/N</b>                                                     | 10.1                                              |                           |                             |                                  |                             |
| <b>Organic matter %</b>                                        | 2.78                                              |                           |                             |                                  |                             |
| <b>P<sub>tot</sub> – P<sub>olsen</sub> (g kg<sup>-1</sup>)</b> | 3.31 – 0.09                                       |                           |                             |                                  |                             |
| <b>Texture</b>                                                 | <i>Clay</i><br>27.6%                              | <i>Fine silt</i><br>32.9% | <i>Coarse silt</i><br>21.1% | <i>Fine sand</i><br>4.60%        | <i>Coarse sand</i><br>13.8% |
|                                                                | <b>P-Total concentration (mg kg<sup>-1</sup>)</b> |                           |                             | <b>DTPA (mg kg<sup>-1</sup>)</b> |                             |
| <b>Mg</b>                                                      | 3130 ± 10                                         |                           |                             | -                                |                             |
| <b>Al</b>                                                      | 21900 ± 800                                       |                           |                             | -                                |                             |
| <b>P</b>                                                       | 1240 ± 60                                         |                           |                             | -                                |                             |
| <b>K</b>                                                       | 2890 ± 170                                        |                           |                             | -                                |                             |
| <b>Ca</b>                                                      | 2580 ± 100                                        |                           |                             | -                                |                             |
| <b>Cr</b>                                                      | 57.5 ± 2.9                                        |                           |                             | <LOQ                             |                             |
| <b>Mn</b>                                                      | 1480 ± 130                                        |                           |                             | 32.9 ± 0.5                       |                             |
| <b>Fe</b>                                                      | 46700 ± 2400                                      |                           |                             | 91.4 ± 0.7                       |                             |
| <b>Co</b>                                                      | 25.1 ± 2.0                                        |                           |                             | 0.19 ± 0.01                      |                             |
| <b>Ni</b>                                                      | 44.2 ± 2.1                                        |                           |                             | 2.01 ± 0.09                      |                             |
| <b>Zn</b>                                                      | 98.4 ± 3.4                                        |                           |                             | 2.55 ± 0.02                      |                             |

**Table S1.** Chemistry of soil used for the experiment before amendments. Mean ± sd. <LOQ: Lower than the limit of quantification.



| 1 <sup>st</sup> harvest |             |                    |                                                                                     |        | 2 <sup>nd</sup> harvest |                                                       |           |
|-------------------------|-------------|--------------------|-------------------------------------------------------------------------------------|--------|-------------------------|-------------------------------------------------------|-----------|
| Treatment               | No of Trays | Age                | Parts                                                                               | N ind. | Age                     | Parts                                                 | N of ind. |
| Ni10Co10                | 3           | 229<br>(164-295) a | <u>Stem</u><br><i>apical, basal</i>                                                 | 7      | 199<br>(138-238) a      | <u>Above-ground</u>                                   | 19        |
| Ni100Co10               | 3           | 194<br>(164-227) a | <u>Leaf</u><br><i>apical, basal</i>                                                 | 12     | 210<br>(203-224) a      |                                                       | 18        |
| Ni10Co100               | 3           | 241<br>(233-253) a | <u>Capitula</u><br><i>bract, receptacle,<br/>seeds, disk floret,<br/>ray floret</i> | 5      | 149<br>(69-238) a       | <u>Roots</u><br><i>tuber, medium<br/>roots, small</i> | 8         |
| Ni100Co100              | 3           | 219<br>(195-263) a |                                                                                     | 3      | 193<br>(139-203) a      | <i>roots, fine roots</i>                              | 4         |

**Table S2.** Details summarising the two harvest periods. Age: age, Parts: Parts digested and analysed via the ICP-OES; N ind.: Number of individual plants harvested Mean (Min-Max). For concerned variables, the affected modalities of the same letter are not significantly different (Waller–Duncan means separation test,  $p < 0.05$ ).

| Treatment | Biomass         |          |                 |          |                 | Stem Diameter |                 |          |                 |          |
|-----------|-----------------|----------|-----------------|----------|-----------------|---------------|-----------------|----------|-----------------|----------|
|           | Stem            |          | Leaf            |          | Inflorescence   |               | Lower           |          | Higher          |          |
| 10/10     | 10.62           |          | 6.09            |          | 1.51            |               | 0.79            |          | 0.37            |          |
|           | (5.64-<br>17.5) | <i>a</i> | (3.75-<br>10.7) | <i>a</i> | (0.96-<br>2.07) | <i>bc</i>     | (0.72-<br>0.86) | <i>a</i> | (0.27-<br>0.56) | <i>a</i> |
| 10/100    | 7.46            |          | 4.85            |          | 2.10            |               | 0.71            |          | 0.30            |          |
|           | (6.30-<br>9.77) | <i>a</i> | (4.24-<br>5.17) | <i>a</i> | (1.86-<br>2.40) | <i>b</i>      | (0.59-<br>0.84) | <i>a</i> | (0.22-<br>0.50) | <i>a</i> |
| 100/10    | 7.11            |          | 4.56            |          | 0.91            |               | 0.72            |          | 0.43            |          |
|           | (2.65-<br>13.7) | <i>a</i> | (3.46-<br>6.35) | <i>a</i> | (0.53-<br>1.61) | <i>c</i>      | (0.64-<br>0.86) | <i>a</i> | (0.34-<br>0.53) | <i>a</i> |
| 100/100   | 12.43           |          | 5.83            |          | 3.41            |               | 0.77            |          | 0.46            |          |
|           | (10.7-<br>15.6) | <i>a</i> | (4.85-<br>6.39) | <i>a</i> | (2.17-<br>4.62) | <i>a</i>      | (0.66-<br>0.92) | <i>a</i> | (0.39-<br>0.51) | <i>a</i> |

**Table S3.** Biomass of stems, leaves and inflorescence and stem diameters (lower and higher) of *Berkheya coddii* according to the added concentrations of Co and Ni in the substrate. Mean (Min-Max).

| Treatment | Seeds from open capitula |                       | Seeds from wilted capitula |                       |
|-----------|--------------------------|-----------------------|----------------------------|-----------------------|
|           | Co                       | Ni                    | Co                         | Ni                    |
| 10/10     | 2.85<br>(0.50-7.06) b    | 325<br>(166-504) c    | 2.57<br>(0.66-5.53) b      | 241<br>(85.0-444) c   |
| 10/100    | 55.2<br>(36.0-69.3) a    | 73.7<br>(44.9-117) c  | 66.3<br>(58.0-82.1) a      | 76.6<br>(45.5-125) c  |
| 100/10    | 4.45<br>(2.86-6.04) b    | 1850<br>(1780-1930) b | 6.58<br>(2.65-15.8) b      | 3130<br>(1318-5200) a |
| 100/100   | 63.2<br>(26.3-95.2) a    | 692<br>(333-934) c    | 59.4<br>(28.5-82.8) a      | 534<br>(215-914) c    |

**Table S4.** Concentration of Co and Ni in seeds of open and wilted capitulum of *Berkheya coddii* according to the added concentrations of Co and Ni in the substrate. Mean (Min-Max). For each variable, the affected modalities of the same letter are not significantly different (Waller–Duncan means separation test,  $p < 0.05$ )
